# Supplementary material for: New Naphthalene Derivatives from the Bulbs of Eleutherine americana with Their Protective Effect on the Injury of HUVECs
Source: Molecules. 2018 Aug 22;23(9):2111. doi: 10.3390/molecules23092111 (PMC6225190; doi:10.3390/molecules23092111)
Supplement: Supplementary file 1 [file molecules-23-02111-s001.pdf]

# New Naphthalene Derivatives from the Bulbs of *Eleutherine americana* with their protective effect on the injury of HUVECs

De-Li Chen <sup>1†</sup>, Mei-Geng Hu <sup>2†</sup>, Yang-Yang Liu <sup>1</sup>, Rong-Tao Li <sup>1</sup>, Meng Yu <sup>1,2</sup>, Xu-Dong Xu <sup>2</sup>, Guo-Xu Ma <sup>1,2,\*</sup>

<sup>1</sup> Hainan Branch of Institute of Medicinal Plant Development, Chinese Academy of Medicinal Sciences & Peking Union Medical College (Hainan Provincial Key Laboratory of Resources Conservation and Development of Southern Medicine), Haikou 570311, China; chendeli9999@163.com (D.-L.C.); eadchris@163.com (Y.-Y.L.); lirt99@126.com (R.-T.L.); 18789087155@163.com (M.Y.)

<sup>2</sup> Institute of Medicinal Plant Development, Chinese Academy of Medical Sciences & Peking Union Medical College, No. 151, Malianwa North Road, Haidian District, Beijing 100193, China; humeigeng@outlook.com (M.-G.H.); xdxu2012@163.com (X.-D.X.)

\* Correspondence: mgxfl8785@163.com; Tel.: +86-010-5783-3296

† Contributed equally to this work.

Received: 25 July 2018; Accepted: 19 August 2018; Published: date

**Abstract:** Five new naphthalene derivatives, named Eleutherols A-C (**1-3**) and eleuthinones B-C (**4-5**), together with three known compounds were isolated from the bulbs of *Eleutherine americana*. Their structures were elucidated on the basis of spectroscopic analysis including HR-ESI-MS, 1D and 2D NMR techniques. These compounds exhibited a potent effect against the injury of human umbilical vein endothelial cell (HUVECs) induced by high concentrations of glucose in vitro.

**Keywords:** *Eleutherine americana*; Naphthalene derivatives; HUVECs

## List of Figures S1-S26

- Figure S1.  $^1\text{H}$ -NMR (600 MHz,  $\text{CDCl}_3$ ) spectrum of the new compound **1**
- Figure S2.  $^{13}\text{C}$ -APT (150 MHz,  $\text{CDCl}_3$ ) spectrum of the new compound **1**
- Figure S3. HSQC spectrum of the new compound **1**
- Figure S4. HMBC spectrum of the new compound **1**
- Figure S5.  $^1\text{H}$ -NMR (600 MHz,  $\text{CDCl}_3$ ) spectrum of the new compound **2**
- Figure S6.  $^{13}\text{C}$ -APT (150 MHz,  $\text{CDCl}_3$ ) spectrum of the new compound **2**
- Figure S7. HSQC spectrum of the new compound **2**
- Figure S8. HMBC spectrum of the new compound **2**
- Figure S9. NOESY spectrum of the new compound **2**
- Figure S10.  $^1\text{H}$ -NMR (600 MHz,  $\text{CDCl}_3$ ) spectrum of the new compound **3**
- Figure S11.  $^{13}\text{C}$ -APT (150 MHz,  $\text{CDCl}_3$ ) spectrum of the new compound **3**
- Figure S12. HSQC spectrum of the new compound **3**
- Figure S13. HMBC spectrum of the new compound **3**
- Figure S14.  $^1\text{H}$ -NMR (600 MHz,  $\text{CDCl}_3$ ) spectrum of the new compound **4**
- Figure S15.  $^{13}\text{C}$ -APT (150 MHz,  $\text{CDCl}_3$ ) spectrum of the new compound **4**
- Figure S16. HSQC spectrum of the new compound **4**
- Figure S17. HMBC spectrum of the new compound **4**
- Figure S18.  $^1\text{H}$ -NMR (600 MHz,  $\text{CDCl}_3$ ) spectrum of the new compound **5**
- Figure S19.  $^{13}\text{C}$ -APT (150 MHz,  $\text{CDCl}_3$ ) spectrum of the new compound **5**
- Figure S20. HSQC spectrum of the new compound **5**
- Figure S21. HMBC spectrum of the new compound **5**
- Figure S22.  $^1\text{H}$ - $^1\text{H}$  COSY spectrum of the new compound **5**
- Figure S23. NOESY spectrum of the new compound **5**
- Figure S24. ECD spectrum of the new compound **1** in MeOH
- Figure S25. ECD spectrum of the new compound **2** in MeOH
- Figure S26. ECD spectrum of the new compound **3** in MeOH

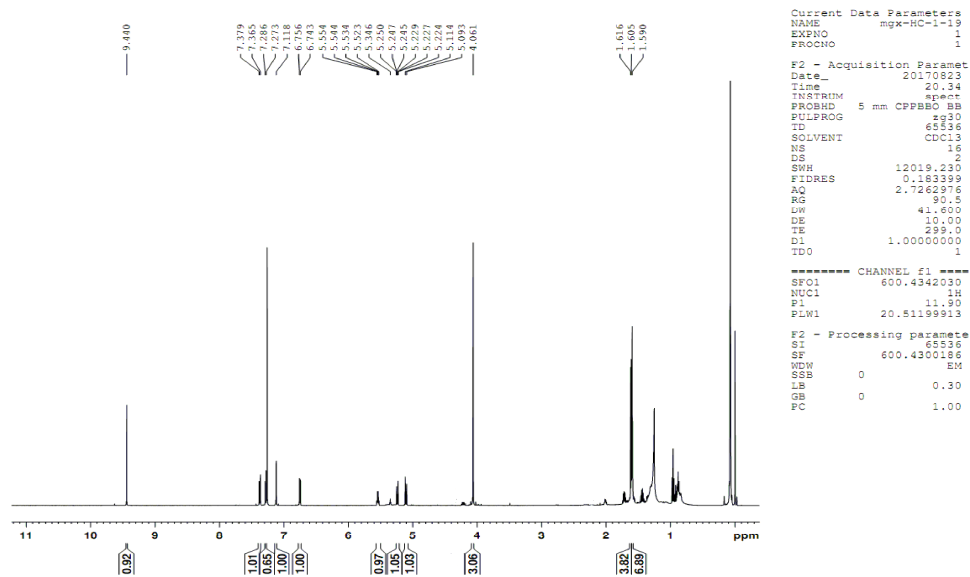

Figure S1.  $^1\text{H}$ -NMR (600 MHz,  $\text{CDCl}_3$ ) spectrum of the new compound **1**

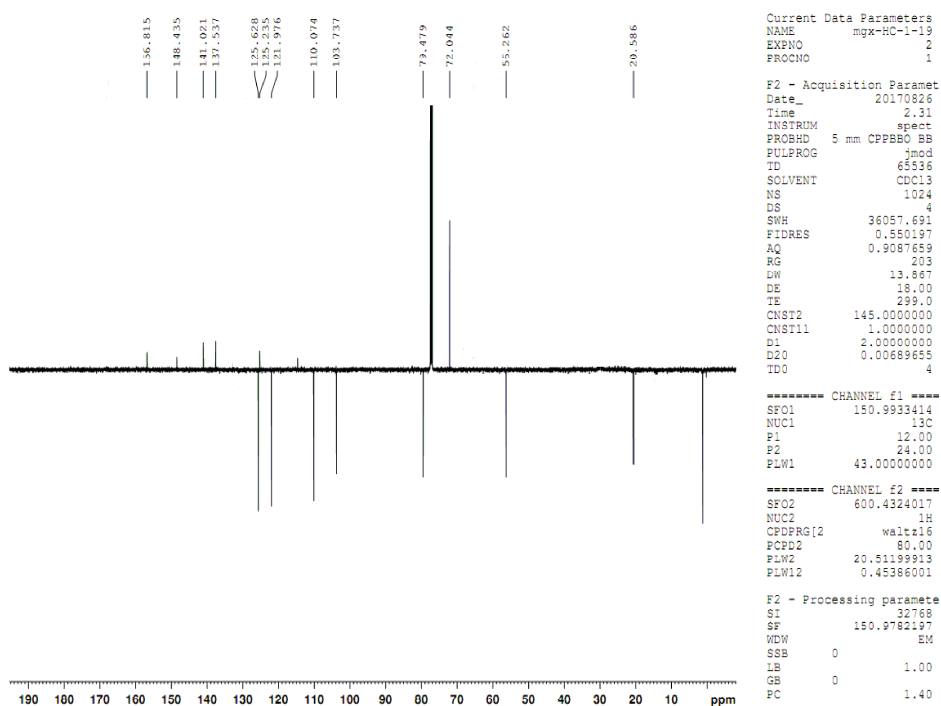

Figure S2.  $^{13}\text{C}$ -APT (150 MHz,  $\text{CDCl}_3$ ) spectrum of the new compound **1**

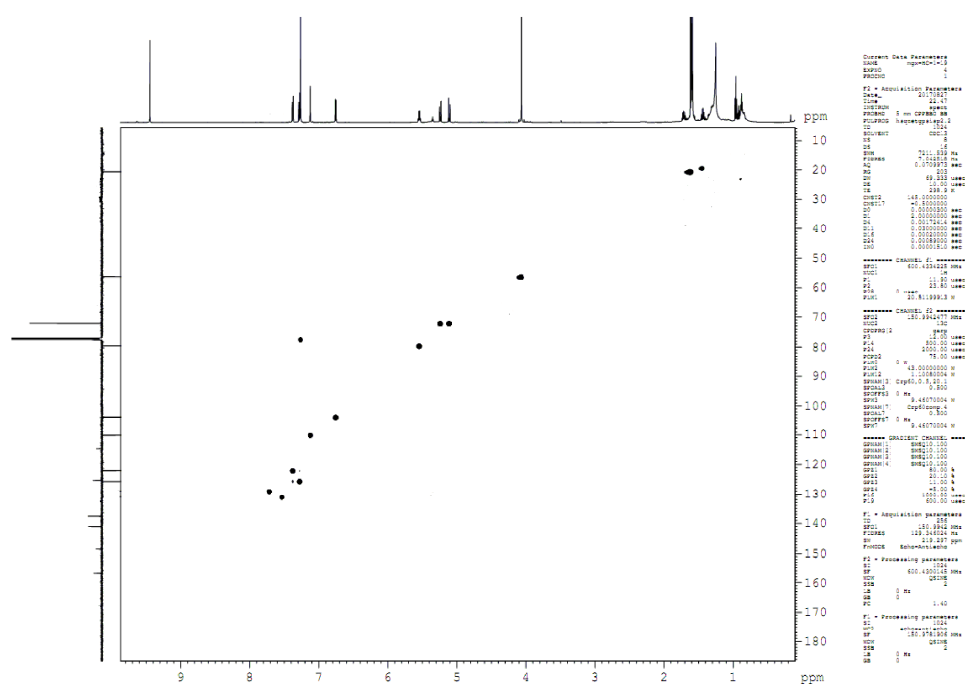

Figure S3. HSQC spectrum of the new compound 1

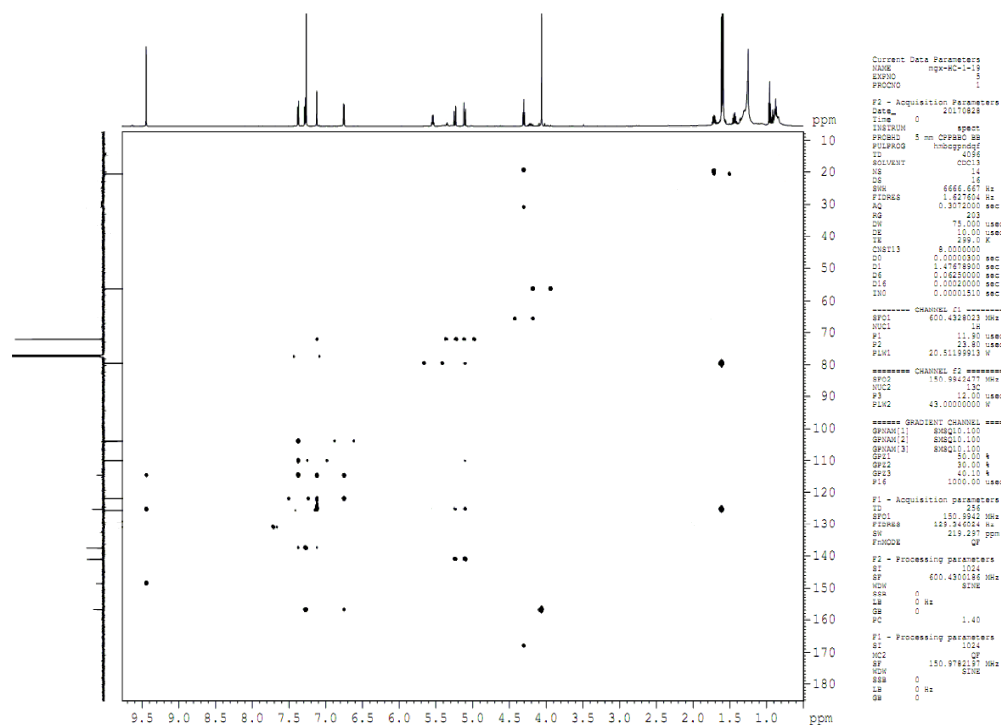

Figure S4. HMBC spectrum of the new compound 1

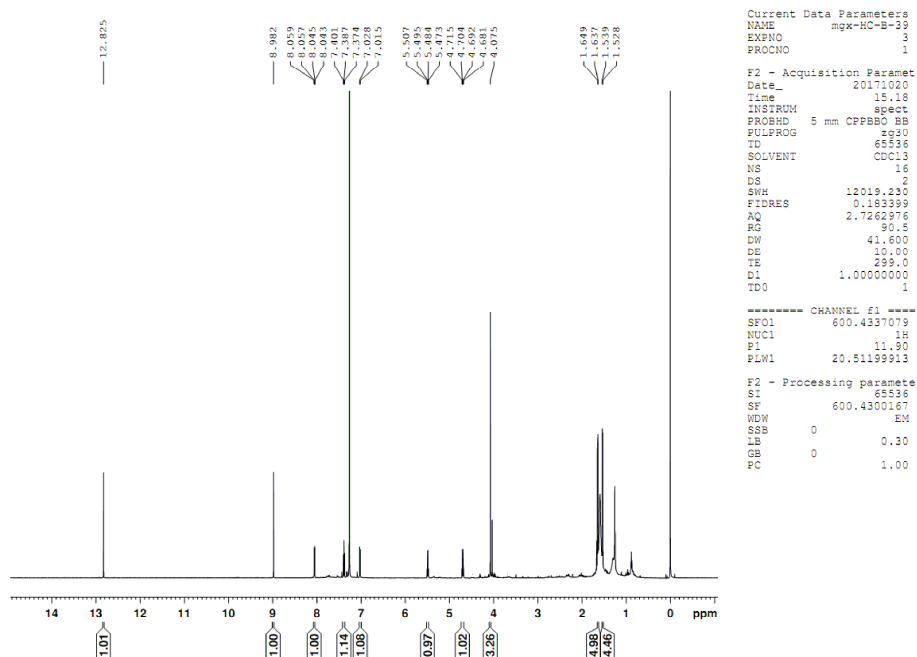

Figure S5.  $^1\text{H}$ -NMR (600 MHz,  $\text{CDCl}_3$ ) spectrum of the new compound **2**

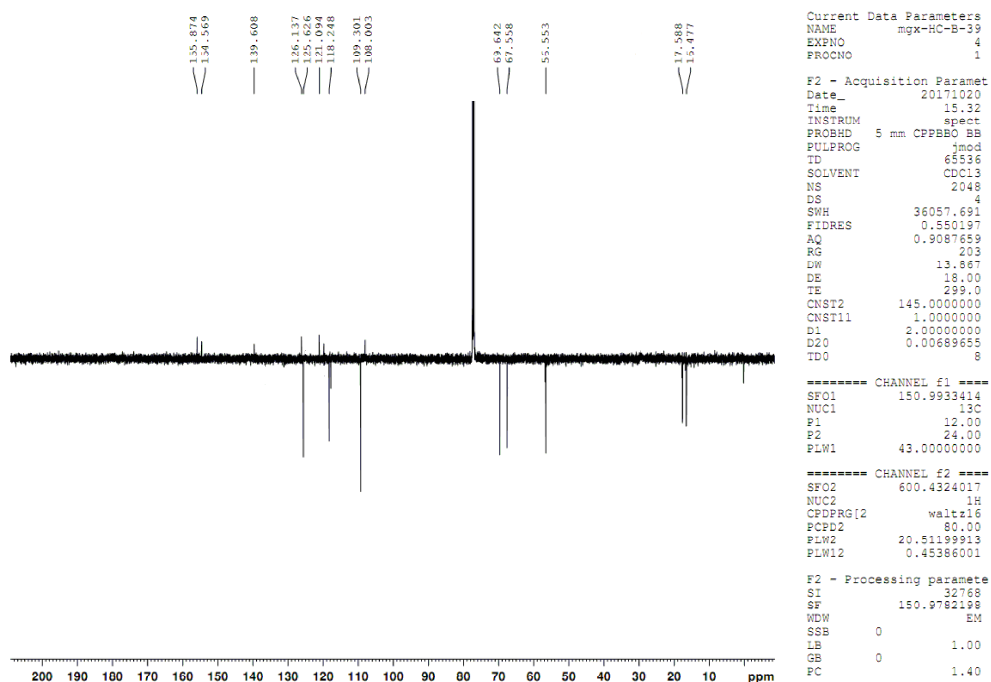

Figure S6.  $^{13}\text{C}$ -APT (150 MHz,  $\text{CDCl}_3$ ) spectrum of the new compound **2**

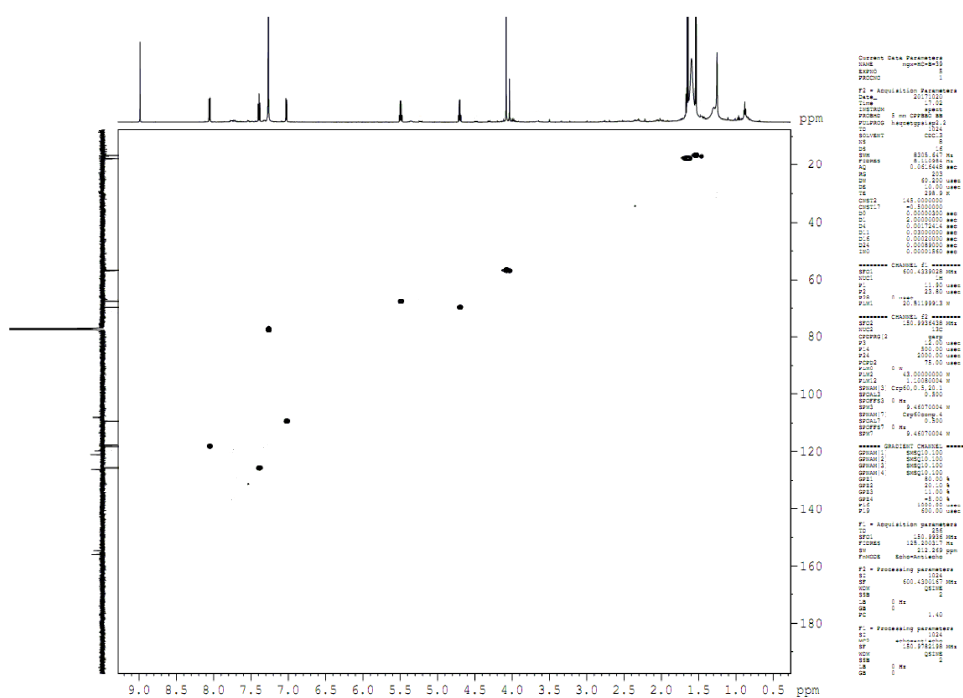

Figure S7. HSQC spectrum of the new compound **2**

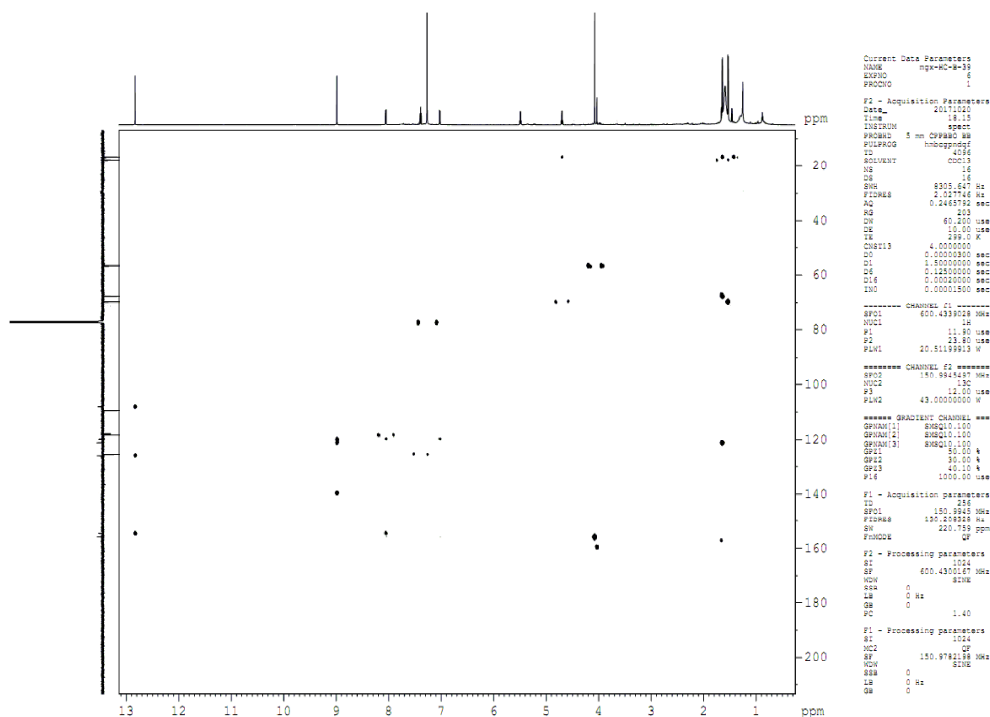

Figure S8. HMBC spectrum of the new compound **2**

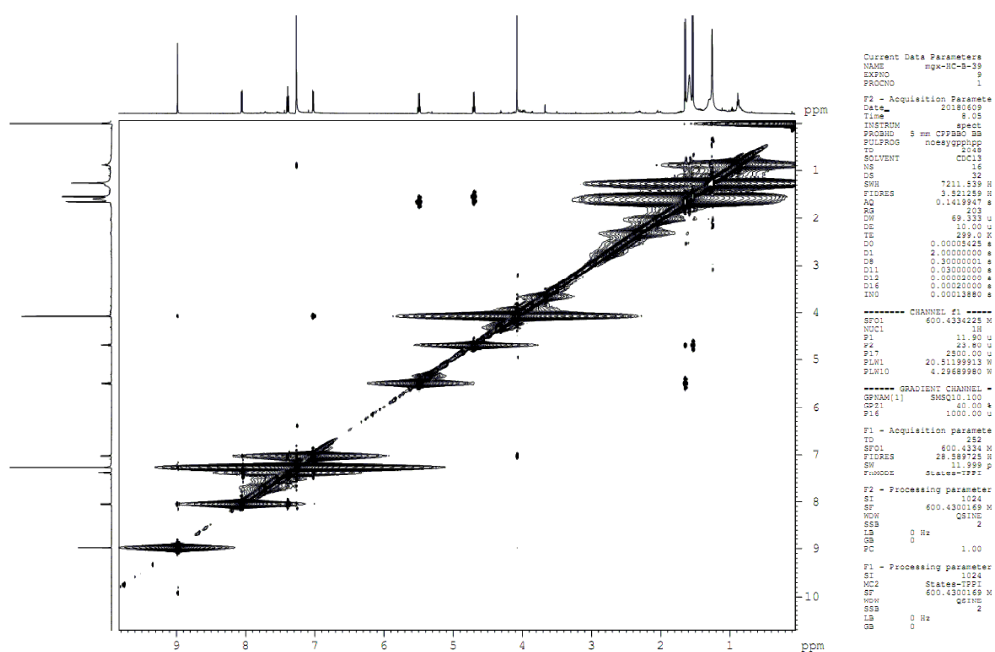

Figure S9. NOESY spectrum of the new compound **2**

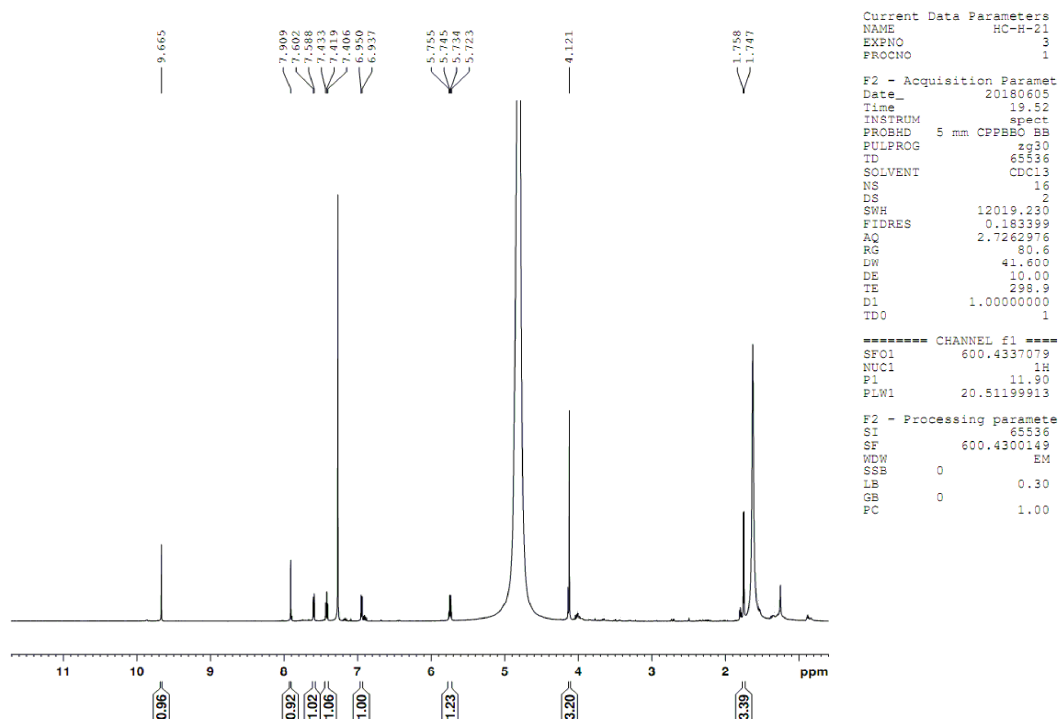

Figure S10.  $^1\text{H}$ -NMR (600 MHz,  $\text{CDCl}_3$ ) spectrum of the new compound **3**

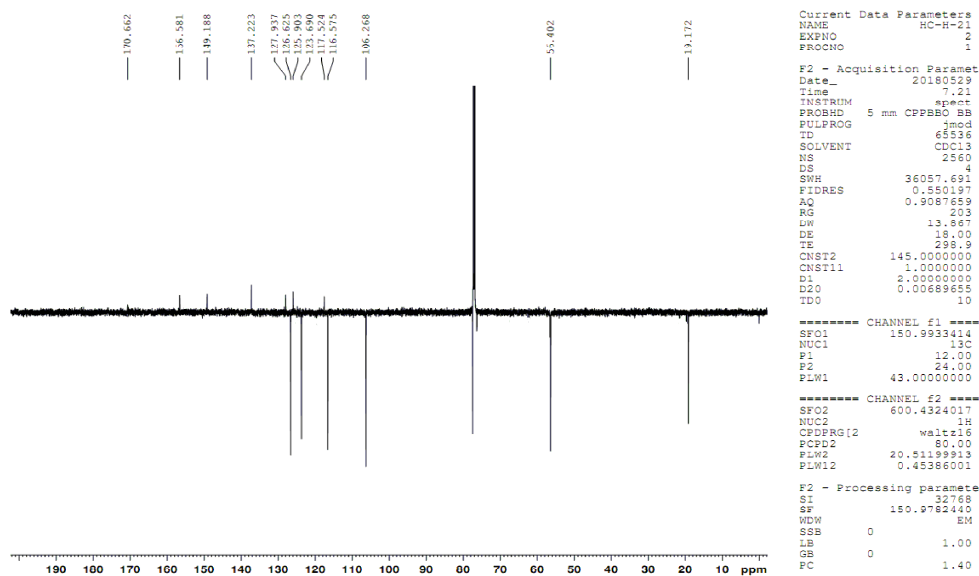

Figure S11.  $^{13}\text{C}$ -APT (150 MHz,  $\text{CDCl}_3$ ) spectrum of the new compound **3**

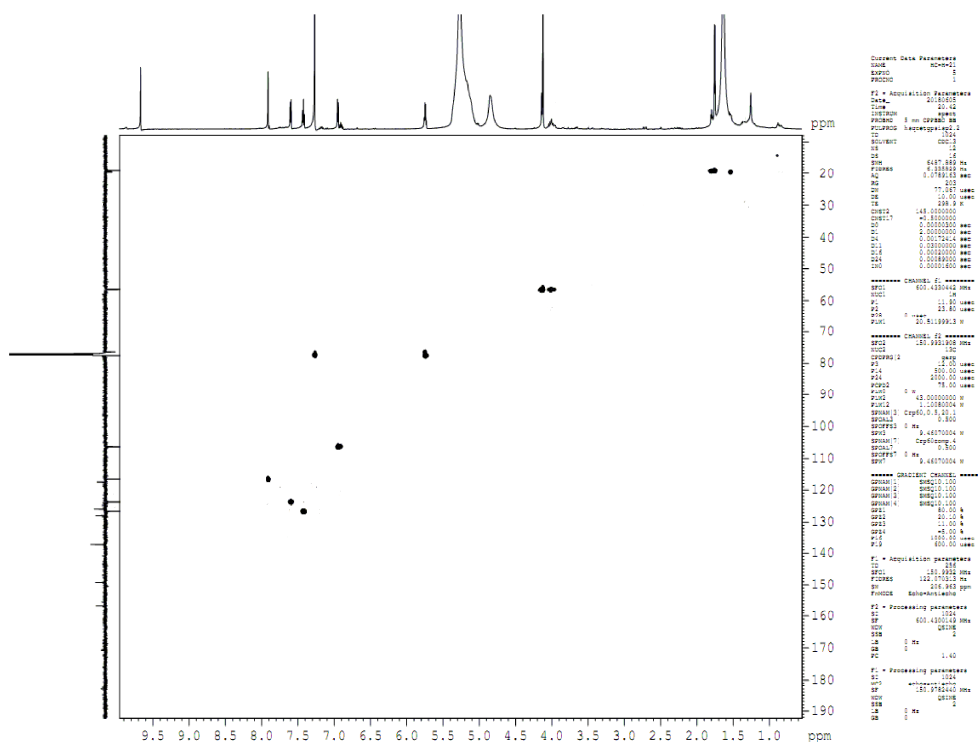

Figure S12. HSQC spectrum of the new compound **3**



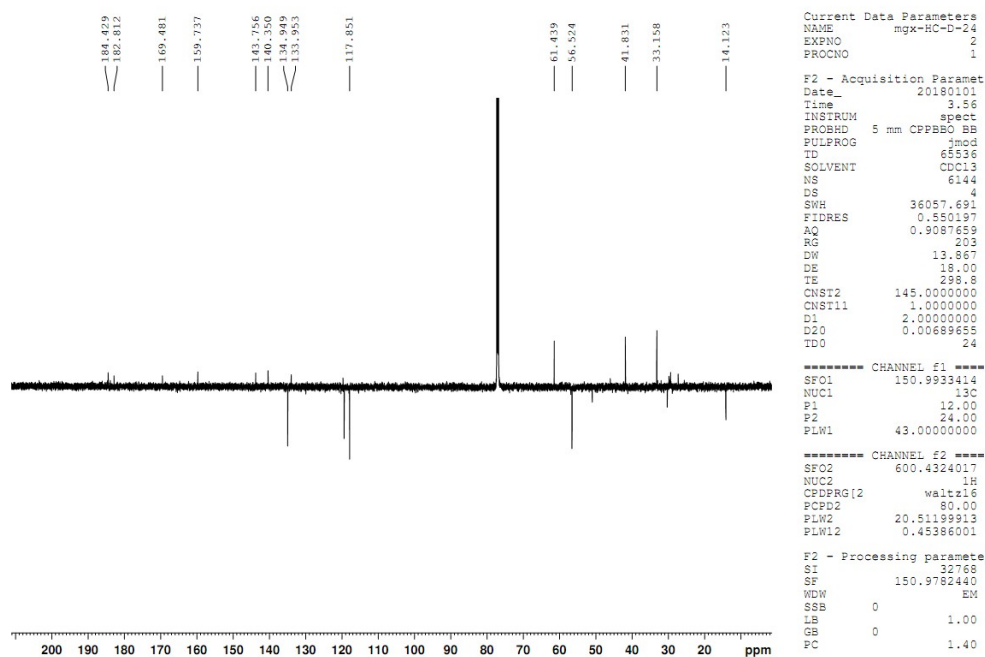

Figure S15.  $^{13}\text{C}$ -APT (150 MHz,  $\text{CDCl}_3$ ) spectrum of the new compound 4

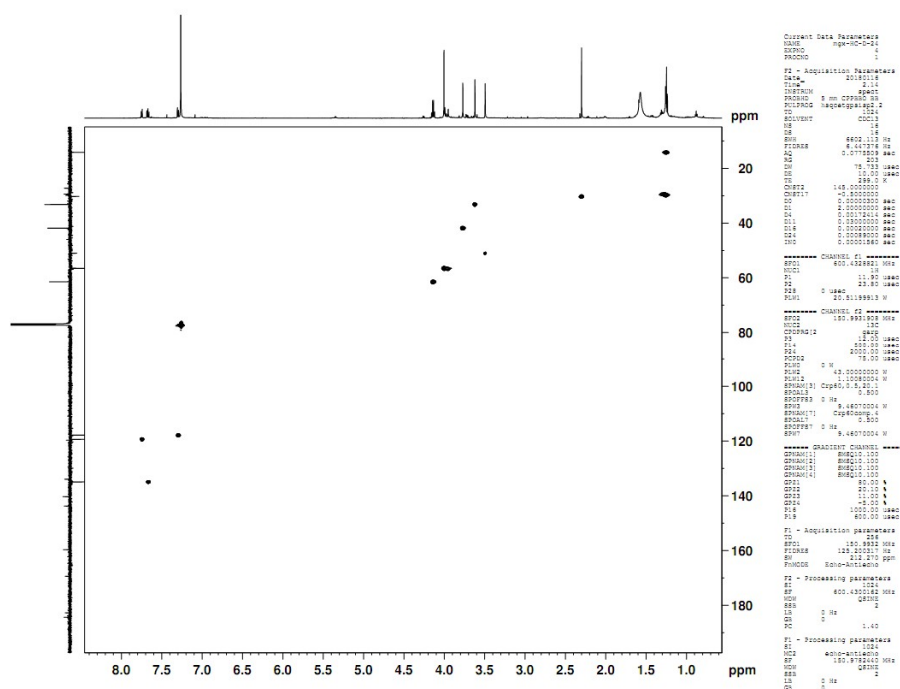

Figure S16. HSQC spectrum of the new compound 4

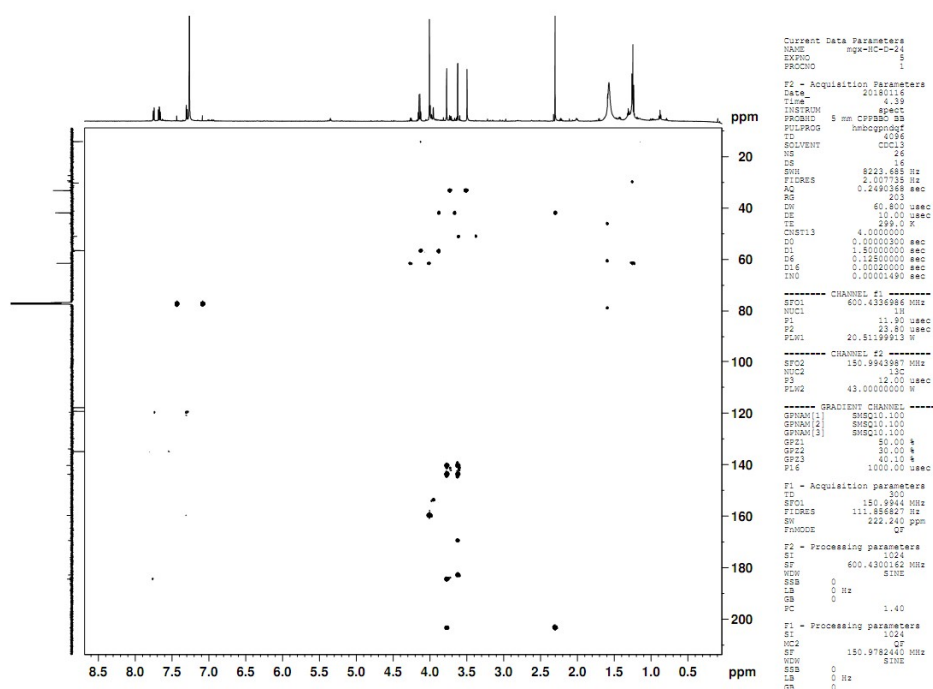

Figure S17. HMBC spectrum of the new compound **4**

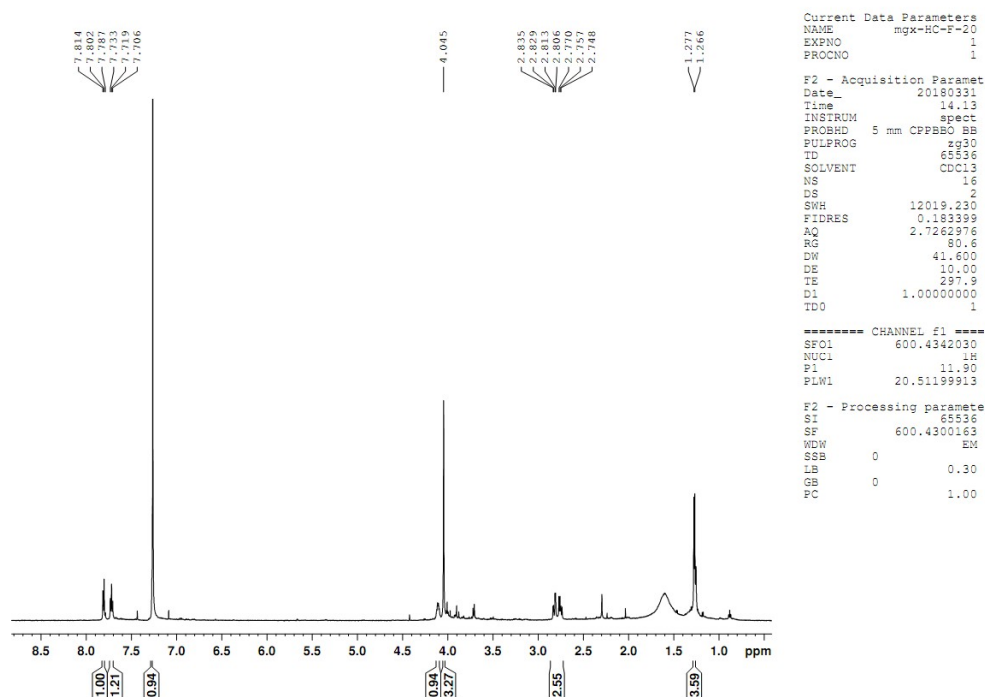

Figure S18.  $^1\text{H}$ -NMR (600 MHz,  $\text{CDCl}_3$ ) spectrum of the new compound **5**

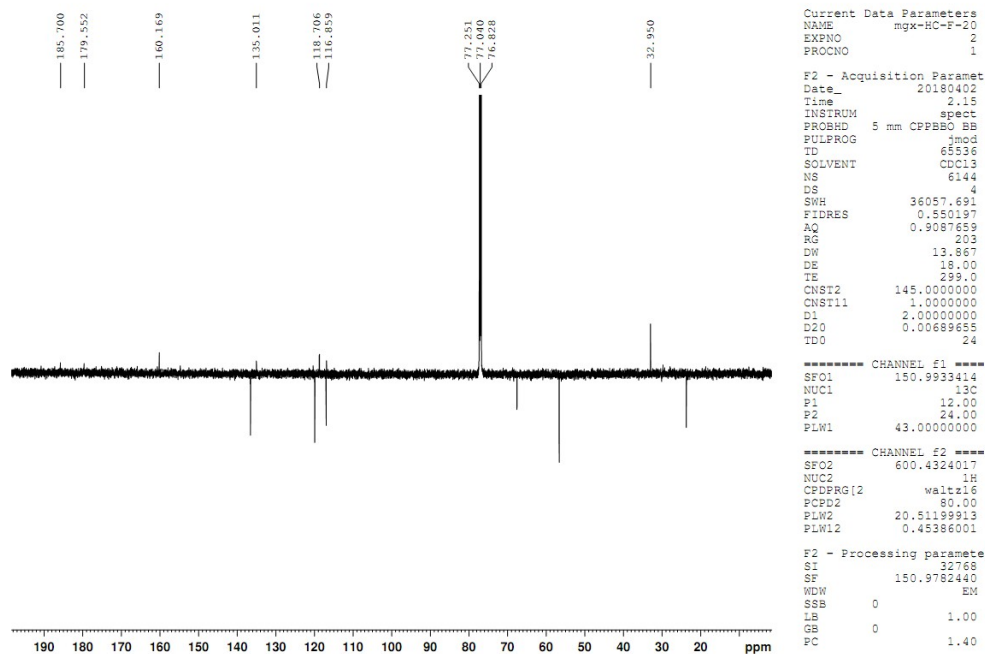

Figure S19.  $^{13}\text{C}$ -APT (150 MHz,  $\text{CDCl}_3$ ) spectrum of the new compound **5**

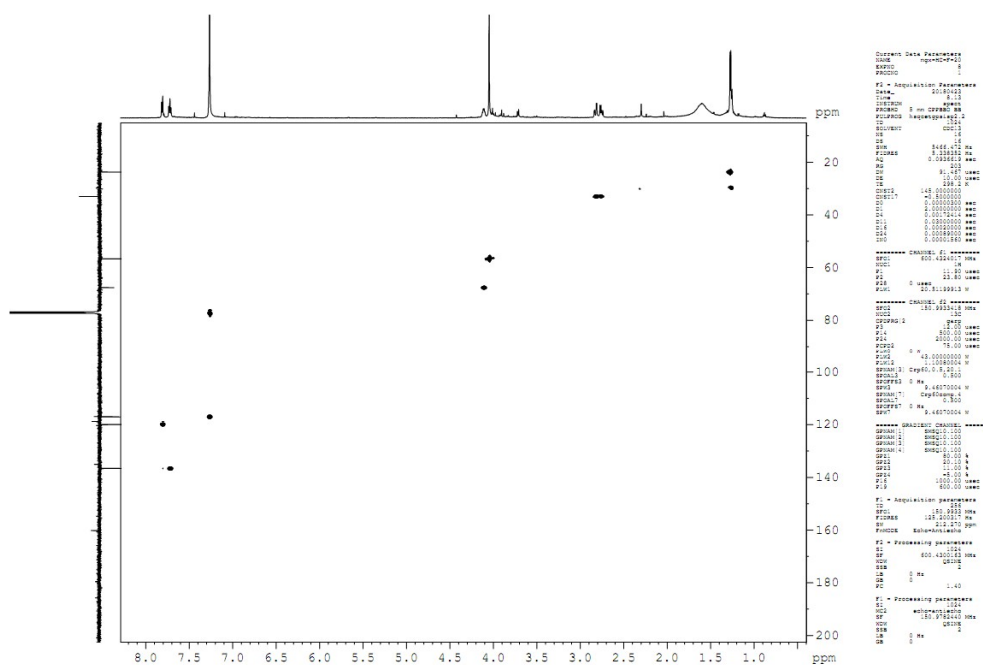

Figure S20. HSQC spectrum of the new compound **5**

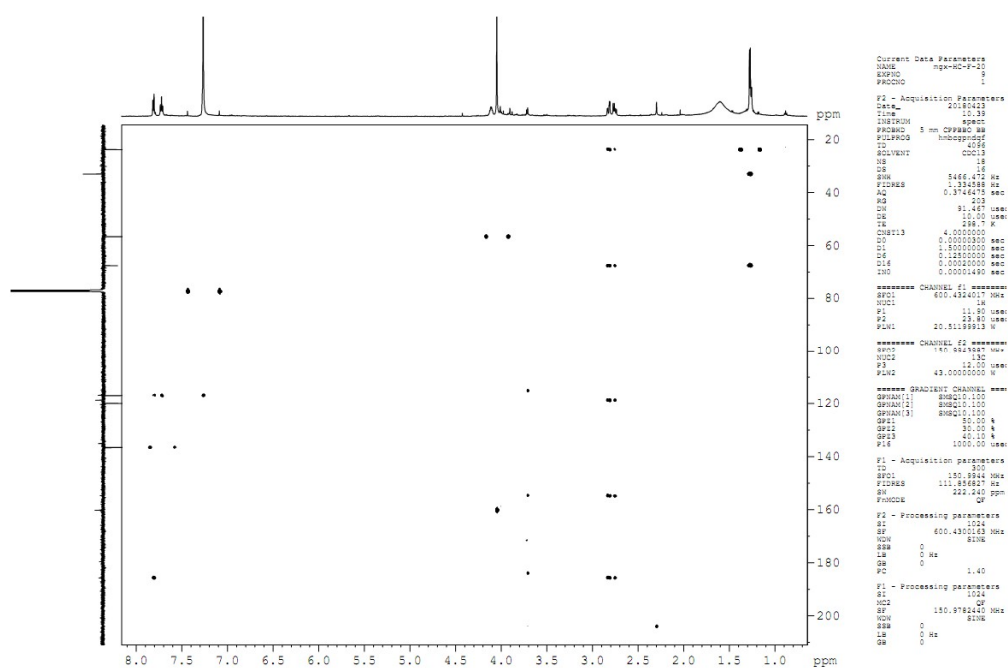

Figure S21. HMBC spectrum of the new compound **5**

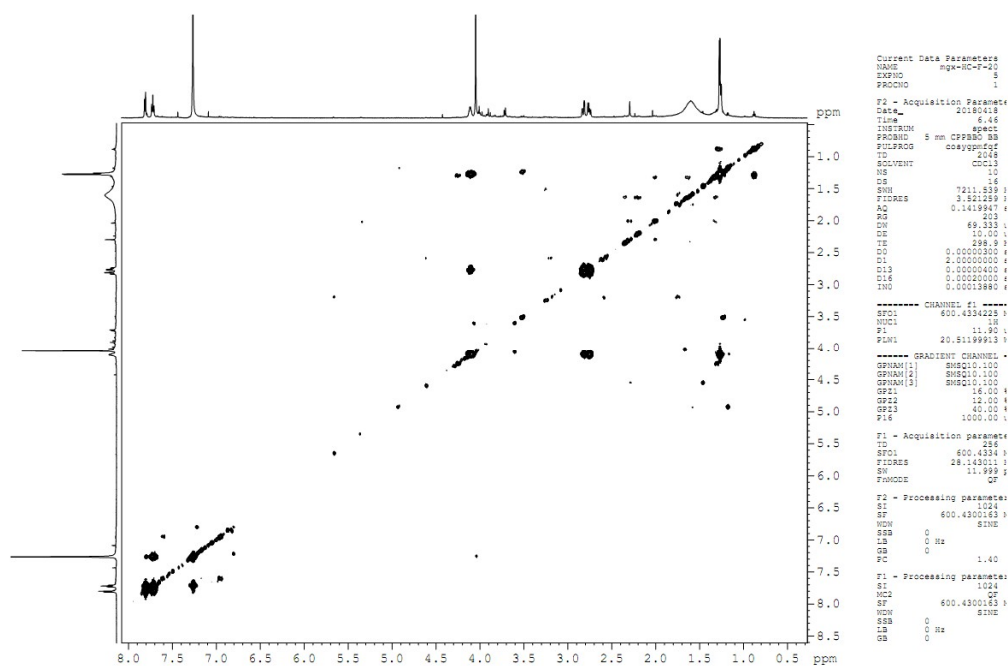

Figure S22.  $^1\text{H}$ - $^1\text{H}$  COSY spectrum of the new compound **5**

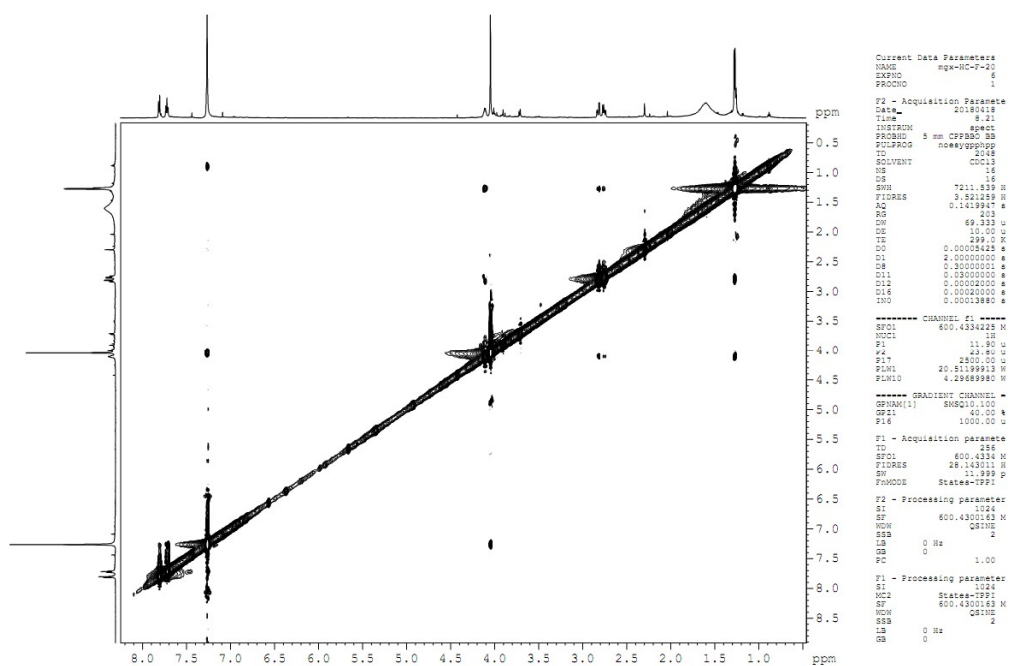

Figure S23. NOESY spectrum of the new compound **5**

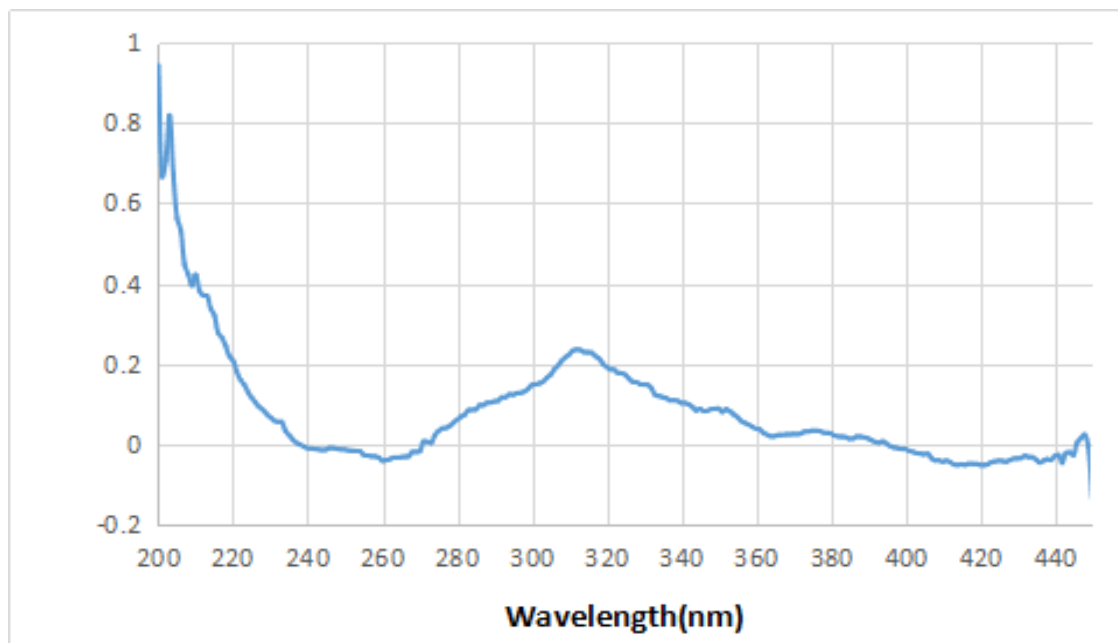

Figure S24. ECD spectrum of the new compound **1** in MeOH

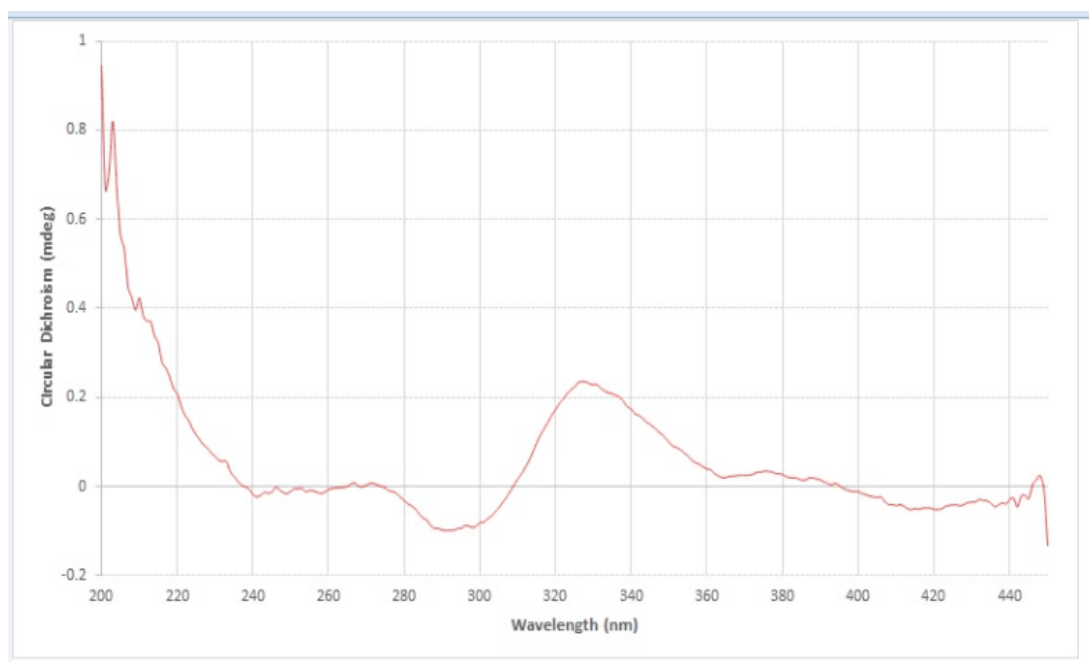

Figure S25. ECD spectrum of the new compound **2** in MeOH

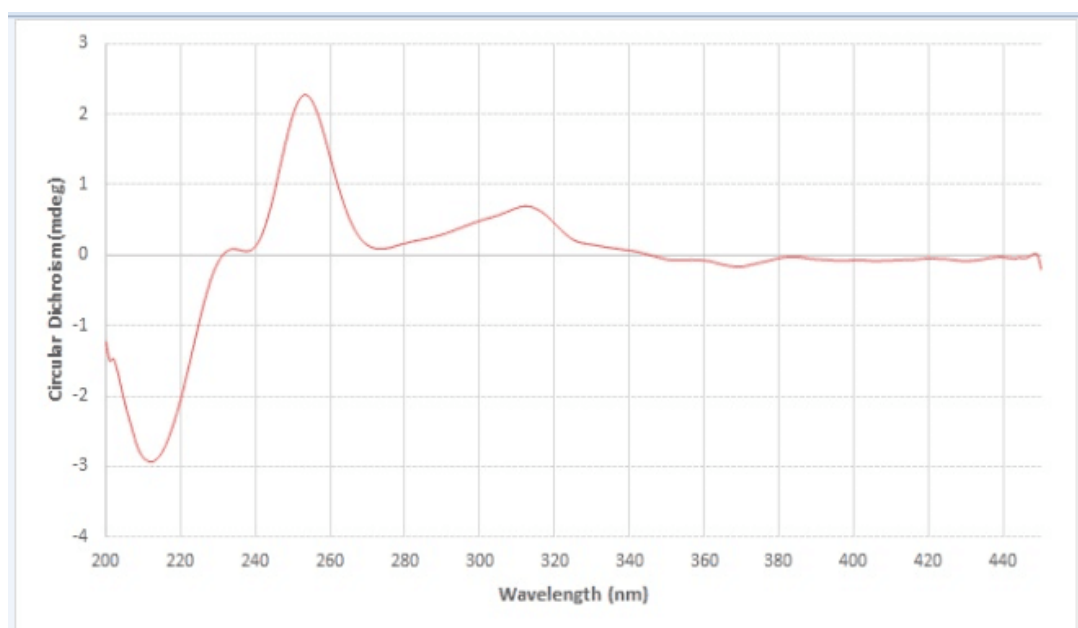

Figure S26. ECD spectrum of the new compound **3** in MeOH
